# Supplementary material for: Pilot Study to Estimate Dietary Fiber Intake in Adults Residing in Chile
Source: Preprints.org preprint supplement (doi:10.20944/preprints202301.0563.v1), 2023-01-31
Supplement: Supplementary file 1 [file Supplementary 2.xlsx]

## Sheet: Front page
SUPPLEMENTARY MATERIAL
SECTION S2: Scoring sheet

## Sheet: Fiber Intake
		FRUITS												VEGETABLES												BREAD												CEREALS
		Never	Less than 1 serving per month	1-3 servings per month	1 serving per week	2-4 servings per week	5-6 servings per week	1 serving per day	2 servings per day	3 servings per day	4 servings per day	5 servings per day	6 servings or more per day	Never	Less than 1 serving per month	1-3 servings per month	1 serving per week	2-4 servings per week	5-6 servings per week	1 serving per day	2 servings per day	3 servings per day	4 servings per day	5 servings per day	6 servings or more per day	Never	Less than 1 serving per month	1-3 servings per month	1 serving per week	2-4 servings per week	5-6 servings per week	1 serving per day	2 servings per day	3 servings per day	4 servings per day	5 servings per day	6 servings or more per day	Never	Less than 1 serving per month	1-3 servings per month	1 serving per week	2-4 servings per week	5-6 servings per week	1 serving per day	2 servings per day	3 servings per day	4 servings per day	5 servings per day	6 servings or more per day
Grams of fiber average		0	0	0.09	0.19	0.56	1.02	1.3	2.6	3.9	5.2	6.5	7.8	0	0	0.09	0.2	0.6	1.1	1.4	2.8	4.2	5.6	7	8.4	0	0	0.19	0.4	1.2	2.2	2.8	5.6	8.4	11.2	14	16.8	0	0	0.23	0.49	1.5	2.7	3.4	6.8	10.2	13.6	17	20.4
Participant
	Survey result
	Fiber intake by food group	0	0	0	0	0	0	0	0	0	0	0	0	0	0	0	0	0	0	0	0	0	0	0	0	0	0	0	0	0	0	0	0	0	0	0	0	0	0	0	0	0	0	0	0	0	0	0	0
[truncated: 25 more columns]
