# Supplementary material for: Pilot Study to Estimate Dietary Fiber Intake in Adults Residing in Chile
Source: Preprints.org preprint supplement (doi:10.20944/preprints202301.0563.v1), 2023-01-31
Supplement: Supplementary file 2 [file Supplementary 3.docx]

**SUPPLEMENTARY MATERIAL**

**SECTION S3:**

Questionnaire for validation by expert judges (Spanish version)

**PARTE I: INSTRUCCIONES**

| **VALIDACIÓN POR EXPERTOS**  **“**VALIDACIÓN DE UN CUESTIONARIO CORTO DE FRECUENCIA DE CONSUMO PARA FIBRA DIETARIA EN POBLACIÓN CHILENA” |
| --- |
| **PARTE I:** En el siguiente documento Usted evaluará un cuestionario corto de frecuencia de consumo para fibra dietaria. Este instrumento forma parte del proyecto denominado “Propuesta para una política pública nacional de aumento de consumo de fibra dietaria en la población chilena, a través del consumo de pan”. El objetivo es ejecutar un estudio exploratorio sobre el consumo de alimentos ricos en fibra en adultos chilenos, a través de un instrumento validado y autorizado para uso en esta investigación *(“Validity and Reproducibility of a Habitual Dietary Fiber Intake Short Food Frequency Questionnaire”. Autora: Genelle Healey*)  En cada ítem deberá hacer una evaluación, rellenando los casilleros con una X, considerando las siguientes opciones de respuesta:   1. = En total desacuerdo 2. = En desacuerdo 3. = No estoy seguro 4. = De acuerdo 5. = Totalmente de acuerdo   Posterior a cada respuesta podrá rellenar el campo “observaciones y recomendaciones”, informando sus propuestas de mejora o las dificultades de comprensión que considere. Finalizando la evaluación, se solicita contestar las hojas “Evaluación general” donde realizará una valoración general del cuestionario, e ”Identificación” donde podrá incluir sus antecedentes personales. |

| **Ingesta de frutas** |
| --- |
| **En promedio durante el último año ¿cuántas porciones de frutas ha consumido?**  Los siguientes son ejemplos de porciones:  1/2 taza de: cerezas, mango, arándanos, manzana, frutilla o  1/4 taza de: tuna, chirimoya, frambuesas, moras o  2 cucharadas de palta o  1/2 unidad de plátano, pera, naranja o  1 unidad de: durazno, níspero, kiwi, damasco o  2 unidades de: damasco deshidratado, ciruelas deshidratadas, mandarinas o  3 unidades de: ciruelas, dátiles   | Nunca | < de 1 porción al mes | Entre 1-3 porciones por mes | 1 porción por semana | 2-4 porciones por semana | 5-6 porciones por semana | 1 porción por día | 2 porciones por día | 3 porciones por día | 4 porciones por día | 5 porciones por día | 6 o más por día | | --- | --- | --- | --- | --- | --- | --- | --- | --- | --- | --- | --- | |  |  |  |  |  |  |  |  |  |  |  |  |  | **Indique su grado de acuerdo frente a las siguientes afirmaciones.** 1= En total desacuerdo; 2= En desacuerdo; 3= No estoy seguro; 4= De acuerdo; 5= Totalmente de acuerdo | 1 | 2 | 3 | 4 | 5 | | --- | --- | --- | --- | --- | --- | | **ADECUACIÓN** | | | | | | | Las porciones indicadas permiten responder con claridad a la pregunta |  |  |  |  |  | | La imagen permite comprender con mayor facilidad la pregunta |  |  |  |  |  | | Las opciones de respuesta se presentan en un orden lógico |  |  |  |  |  | | **PERTINENCIA** | | | | | | | La pregunta es pertinente para lograr el objetivo del instrumento |  |  |  |  |  | | La imagen es pertinente para lograr el objetivo del instrumento |  |  |  |  |  | |

| **Ingesta de verduras** |
| --- |
| **En promedio durante el último año ¿cuántas porciones de verduras ha consumido?**  Los siguientes son ejemplos de porciones:  1/2 taza: berenjenas, cebolla cruda, pimiento verde, repollo crudo, espárragos, coliflor cocida, papa, acelga, zanahoria o  1/3 taza de: espinaca, brócoli, porotos verdes o  1 taza de: achicoria, betarraga, tomate crudo, zapallo camote, apio   | Nunca | < de 1 porción al mes | Entre 1-3 porciones por mes | 1 porción por semana | 2-4 porciones por semana | 5-6 porciones por semana | 1 porción por día | 2 porciones por día | 3 porciones por día | 4 porciones por día | 5 porciones por día | 6 o más por día | | --- | --- | --- | --- | --- | --- | --- | --- | --- | --- | --- | --- | |  |  |  |  |  |  |  |  |  |  |  |  |  | **Indique su grado de acuerdo frente a las siguientes afirmaciones.** 1= En total desacuerdo; 2= En desacuerdo; 3= No estoy seguro; 4= De acuerdo; 5= Totalmente de acuerdo | 1 | 2 | 3 | 4 | 5 | | --- | --- | --- | --- | --- | --- | | **ADECUACIÓN** | | | | | | | Las porciones indicadas permiten responder con claridad a la pregunta |  |  |  |  |  | | La imagen permite comprender con mayor facilidad la pregunta |  |  |  |  |  | | Las opciones de respuesta se presentan en un orden lógico |  |  |  |  |  | | **PERTINENCIA** | | | | | | | La pregunta es pertinente para lograr el objetivo del instrumento |  |  |  |  |  | | La imagen es pertinente para lograr el objetivo del instrumento |  |  |  |  |  | |

| **Ingesta de pan** |
| --- |
| **En promedio durante el último año ¿cuántas porciones de pan ha consumido?**  Los siguientes son ejemplos de porciones:  1/2 unidad de: pan centeno, hallulla integral o  1 unidad de pan ciabatta o  2 dientes de pan marraqueta o  1 rebanada de pan molde integral o  1 unidad de pan pita integral   | Nunca | < de 1 porción al mes | Entre 1-3 porciones por mes | 1 porción por semana | 2-4 porciones por semana | 5-6 porciones por semana | 1 porción por día | 2 porciones por día | 3 porciones por día | 4 porciones por día | 5 porciones por día | 6 o más por día | | --- | --- | --- | --- | --- | --- | --- | --- | --- | --- | --- | --- | |  |  |  |  |  |  |  |  |  |  |  |  |  | **Indique su grado de acuerdo frente a las siguientes afirmaciones.** 1= En total desacuerdo; 2= En desacuerdo; 3= No estoy seguro; 4= De acuerdo; 5= Totalmente de acuerdo | 1 | 2 | 3 | 4 | 5 | | --- | --- | --- | --- | --- | --- | | **ADECUACIÓN** | | | | | | | Las porciones indicadas permiten responder con claridad a la pregunta |  |  |  |  |  | | La imagen permite comprender con mayor facilidad la pregunta |  |  |  |  |  | | Las opciones de respuesta se presentan en un orden lógico |  |  |  |  |  | | **PERTINENCIA** | | | | | | | La pregunta es pertinente para lograr el objetivo del instrumento |  |  |  |  |  | | La imagen es pertinente para lograr el objetivo del instrumento |  |  |  |  |  | |

| **Ingesta de cereales** |
| --- |
| **En promedio durante el último año ¿cuántas porciones de cereales ha consumido?**  Los siguientes son ejemplos de porciones:  1/4 taza de: avena integral, pasta integral o  1 taza de arroz integral cocido   | Nunca | < de 1 porción al mes | Entre 1-3 porciones por mes | 1 porción por semana | 2-4 porciones por semana | 5-6 porciones por semana | 1 porción por día | 2 porciones por día | 3 porciones por día | 4 porciones por día | 5 porciones por día | 6 o más por día | | --- | --- | --- | --- | --- | --- | --- | --- | --- | --- | --- | --- | |  |  |  |  |  |  |  |  |  |  |  |  |  | **Indique su grado de acuerdo frente a las siguientes afirmaciones.** 1= En total desacuerdo; 2= En desacuerdo; 3= No estoy seguro; 4= De acuerdo; 5= Totalmente de acuerdo | 1 | 2 | 3 | 4 | 5 | | --- | --- | --- | --- | --- | --- | | **ADECUACIÓN** | | | | | | | Las porciones indicadas permiten responder con claridad a la pregunta |  |  |  |  |  | | La imagen permite comprender con mayor facilidad la pregunta |  |  |  |  |  | | Las opciones de respuesta se presentan en un orden lógico |  |  |  |  |  | | **PERTINENCIA** | | | | | | | La pregunta es pertinente para lograr el objetivo del instrumento |  |  |  |  |  | | La imagen es pertinente para lograr el objetivo del instrumento |  |  |  |  |  | |

| **Ingesta de frutos secos** |
| --- |
| **En promedio durante el último año ¿cuántas porciones de frutos secos ha consumido?**  Los siguientes son ejemplos de porciones:  1/2 taza de: castañas de Cajú o  1/4 taza de: pistachos, avellana, nueces, almendras o  1 cucharada de chía   | Nunca | < de 1 porción al mes | Entre 1-3 porciones por mes | 1 porción por semana | 2-4 porciones por semana | 5-6 porciones por semana | 1 porción por día | 2 porciones por día | 3 porciones por día | 4 porciones por día | 5 porciones por día | 6 o más por día | | --- | --- | --- | --- | --- | --- | --- | --- | --- | --- | --- | --- | |  |  |  |  |  |  |  |  |  |  |  |  |  | **Indique su grado de acuerdo frente a las siguientes afirmaciones.** 1= En total desacuerdo; 2= En desacuerdo; 3= No estoy seguro; 4= De acuerdo; 5= Totalmente de acuerdo | 1 | 2 | 3 | 4 | 5 | | --- | --- | --- | --- | --- | --- | | **ADECUACIÓN** | | | | | | | Las porciones indicadas permiten responder con claridad a la pregunta |  |  |  |  |  | | La imagen permite comprender con mayor facilidad la pregunta |  |  |  |  |  | | Las opciones de respuesta se presentan en un orden lógico |  |  |  |  |  | | **PERTINENCIA** | | | | | | | La pregunta es pertinente para lograr el objetivo del instrumento |  |  |  |  |  | | La imagen es pertinente para lograr el objetivo del instrumento |  |  |  |  |  | |

| **Ingesta de legumbres** |
| --- |
| **En promedio durante el último año ¿cuántas porciones de legumbres ha consumido?**  Los siguientes son ejemplos de porciones:  1 taza de: porotos de soya, arvejas cocidas o  1/2 taza de: porotos cocidos, lentejas cocidas, garbanzos cocidos   | Nunca | < de 1 porción al mes | Entre 1-3 porciones por mes | 1 porción por semana | 2-4 porciones por semana | 5-6 porciones por semana | 1 porción por día | 2 porciones por día | 3 porciones por día | 4 porciones por día | 5 porciones por día | 6 o más por día | | --- | --- | --- | --- | --- | --- | --- | --- | --- | --- | --- | --- | |  |  |  |  |  |  |  |  |  |  |  |  |  | **Indique su grado de acuerdo frente a las siguientes afirmaciones.** 1= En total desacuerdo; 2= En desacuerdo; 3= No estoy seguro; 4= De acuerdo; 5= Totalmente de acuerdo | 1 | 2 | 3 | 4 | 5 | | --- | --- | --- | --- | --- | --- | | **ADECUACIÓN** | | | | | | | Las porciones indicadas permiten responder con claridad a la pregunta |  |  |  |  |  | | La imagen permite comprender con mayor facilidad la pregunta |  |  |  |  |  | | Las opciones de respuesta se presentan en un orden lógico |  |  |  |  |  | | **PERTINENCIA** | | | | | | | La pregunta es pertinente para lograr el objetivo del instrumento |  |  |  |  |  | | La imagen es pertinente para lograr el objetivo del instrumento |  |  |  |  |  | |

**PARTE II: EVALUACIÓN GENERAL**

**Por favor, marque con una X la respuesta:**

|  | **SÍ** | **NO** |
| --- | --- | --- |
| El instrumento contiene instrucciones claras y precisas para que un no experto en nutrición pueda responder |  |  |
| Las imágenes asociadas a los listados de alimentos son apropiadas y fáciles de comprender por un no experto en nutrición |  |  |
| El cuestionario es demasiado largo |  |  |

|  | **Evaluación General del Instrumento** | | | |
| --- | --- | --- | --- | --- |
|  | **Excelente** | **Buena** | **Regular** | **Deficiente** |
| Validez de contenido del instrumento |  |  |  |  |

| **Observaciones y recomendaciones generales del instrumento** | |
| --- | --- |
| Motivo por el que no lo considera adecuado |  |
| Motivo por los que no lo considera pertinente |  |
| Propuestas de mejora |  |

**PARTE III: IDENTIFICACIÓN DEL EXPERTO**

| Nombre y apellidos |  |
| --- | --- |
| Filiación |  |
| Correo electrónico |  |
| Fecha de validación (dd-mm-aa) |  |

**Muchas gracias por su valiosa contribución**
